# Supplementary material
Source: ML conference proceedings conference paper supplement (https://openreview.net/forum?id=7rM-nGqEpIe)
Supplement: supplementary_material [file attachment]

| Test Data Set                                                                       |            |        |            |                                                         |          |      |             |                 |                          |                                                                                                                   |
|-------------------------------------------------------------------------------------|------------|--------|------------|---------------------------------------------------------|----------|------|-------------|-----------------|--------------------------|-------------------------------------------------------------------------------------------------------------------|
| Design                                                                              | # Elements |        | Variations |                                                         | Match    |      |             |                 |                          | Grouping                                                                                                          |
|                                                                                     | Source     | Target | Count      | Type                                                    | Separate | All  | Node Kernel | Uniform weights | Match highest similarity | Inferred k                                                                                                        |
|                                                                                     | 11.08      | 40.08  | 4.23       |                                                         | 0.97     | 0.96 | 0.84        | 0.95            | 0.93                     |                                                                                                                   |
|    | 17         | 21     | 2          | Text<br>Cardinality                                     | 1.00     | 1.00 | 0.95        | 1.00            | 0.83                     |                                |
|    | 5          | 25     | 3          | Color<br>Size<br>Text                                   | 1.00     | 1.00 | 0.96        | 1.00            | 0.96                     |                                |
|    | 10         | 50     | 3          | Color<br>Shape<br>Size                                  | 1.00     | 1.00 | 0.76        | 1.00            | 1.00                     |                                |
|    | 14         | 40     | 3          | Color<br>Layout<br>Text                                 | 1.00     | 1.00 | 1.00        | 1.00            |                          |                                |
|    | 6          | 15     | 4          | Cardinality<br>Color<br>Size<br>Text                    | 1.00     | 1.00 | 1.00        | 1.00            |                          |                                |
|    | 9          | 63     | 4          | Color<br>Layout<br>Shape<br>Text                        | 0.95     | 0.95 | 0.90        | 0.96            |                          |                                |
|   | 8          | 46     | 4          | Cardinality<br>Color<br>Shape<br>Size                   | 0.98     | 0.98 | 0.72        | 1.00            |                          |                               |
|  | 8          | 33     | 5          | Cardinality<br>Color<br>Layout<br>Shape<br>Text         | 1.00     | 1.00 | 0.76        | 1.00            | 1.00                     | <div>Kernel Groupings</div>  |
|  | 16         | 60     | 5          | Cardinality<br>Color<br>Layout<br>Shape<br>Size<br>Text | 0.90     | 0.90 | 0.78        | 0.86            | 0.87                     |                              |

|                                                                                     |    |     |   |                                                         |           |       |       |       |       |                                                                                       |                                                                                     |  |
|-------------------------------------------------------------------------------------|----|-----|---|---------------------------------------------------------|-----------|-------|-------|-------|-------|---------------------------------------------------------------------------------------|-------------------------------------------------------------------------------------|--|
|    | 10 | 33  | 5 | Cardinality<br>Color<br>Size<br>Text<br>Layout          | 1.00      | 1.00  | 0.94  | 0.97  | 1.00  |    |  |  |
|    | 4  | 36  | 5 | Color<br>Layout<br>Shape<br>Size<br>Text                | 0.97      | 0.89  | 1.00  | 0.86  |       |    |                                                                                     |  |
|    | 30 | 76  | 6 | Color<br>Cardinality<br>Shape<br>Size<br>Layout<br>Text | 1.00      | 1.00  | 0.47  | 0.87  |       |    |  |  |
|    | 7  | 23  | 6 | Cardinality<br>Layout<br>Shape<br>Size<br>Text<br>Type  | 0.78      | 0.78  | 0.78  | 0.78  | 0.78  |    |                                                                                     |  |
|    | 38 | 73  | 5 | Cardinality<br>Color<br>Layout<br>Shape<br>Text         | 1.00      | 1.00  | 0.95  | 1.00  |       |    |                                                                                     |  |
|    | 14 | 62  | 5 | Cardinality<br>Layout<br>Shape<br>Size<br>Text          | 918032786 | 0.952 | 0.677 | 0.887 |       |    |                                                                                     |  |
|   | 9  | 36  | 4 | Shape<br>Size<br>Layout<br>Text                         | 1.000     | 0.972 | 0.806 | 0.972 | 0.972 |   |                                                                                     |  |
|  | 40 | 120 | 4 | Cardinality<br>Layout<br>Shape<br>Size                  | 1.000     | 1.000 |       |       |       |  |                                                                                     |  |
|  | 24 | 109 | 5 | Cardinality<br>Color<br>Shape<br>Size<br>Layout         | 1.000     | 1.000 |       |       |       |  |                                                                                     |  |
|  | 9  | 33  | 5 | Cardinality<br>Color<br>Shape<br>Size<br>Text           | 1.000     | 1.000 |       |       |       |  |                                                                                     |  |

|  |    |    |   |                                                        |       |       |       |       |  |  |
|--|----|----|---|--------------------------------------------------------|-------|-------|-------|-------|--|--|
|  | 16 | 48 | 4 | Color<br>Shape<br>Text<br>Layout                       |       | 0.958 |       |       |  |  |
|  | 19 | 52 | 5 | Cardinality<br>Color<br>Shape<br>Size<br>Layout        | 0.923 | 0.923 |       |       |  |  |
|  | 10 | 37 | 6 | Cardinality<br>Color<br>Shape<br>Size<br>Laout<br>Text | 0.838 | 0.784 |       |       |  |  |
|  | 19 | 27 | 5 | Cardinality<br>Color<br>Shape<br>Size<br>Layout        | 1.000 | 1.000 | 0.741 | 1.000 |  |  |
|  | 12 | 47 | 5 | Color<br>Layout<br>Shape<br>Size<br>Text               | 1.000 | 1.000 | 1.000 | 1.000 |  |  |
|  | 16 | 48 | 4 | Color<br>Layout<br>Shape<br>Text                       | 0.896 | 0.854 |       |       |  |  |

\* Ablation Experiments were run on a subset of the designs.

\* Highlighted rows indicate designs with nested source tree.
